# Supplementary material
Source: PubMed Central journal article supplement (PMC2998127)
Supplement: supp_M110.139683_jbc.M110.139683-1.pdf [file supp_M110.139683_jbc.M110.139683-1.pdf]

## SUPPLEMENT

# Crystal Structure and Mutational Analysis of Aminoacylhistidine Dipeptidase from *Vibrio alginolyticus* Reveal a New Architecture of M20 Metallopeptidases

Chin-Yuan Chang<sup>a</sup>, Yin-Cheng Hsieh<sup>b,c</sup>, Ting-Yi Wang<sup>a</sup>, Yi-Chin Chen<sup>a</sup>, Yu-Kuo  
Wang<sup>a</sup>, Ting-Wei Chiang<sup>b,d</sup>, Yi-Ju Chen<sup>a</sup>, Cheng-Hsiang Chang<sup>a</sup>, Chun-Jung  
Chen<sup>b,d,e,\*</sup>, and Tung-Kung Wu<sup>a,\*</sup>

<sup>a</sup>Department of Biological Science and Technology, National Chiao Tung University,  
Hsinchu 30010, Taiwan

<sup>b</sup>Life Science Group, Scientific Research Division, National Synchrotron Radiation  
Research Center, Hsinchu 30076, Taiwan

<sup>c</sup>Institute of Bioinformatics and Structural Biology, <sup>d</sup>Department of Physics National  
Tsing Hua University, Hsinchu 30013, Taiwan

<sup>e</sup>Institute of Biotechnology, National Cheng Kung University, Tainan 701, Taiwan

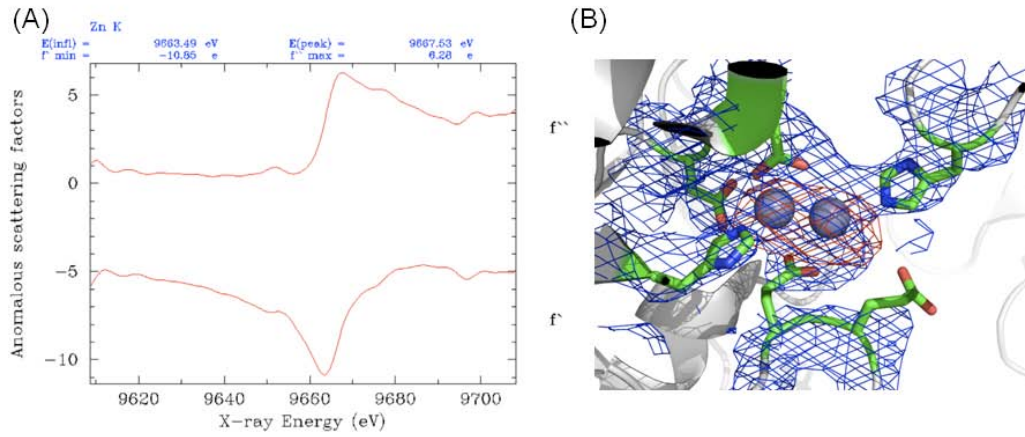

**Supplement Figure 1.** The PepD zinc ions determination. (A) The absorption spectra of anomalous scattering factors for zinc ions in PepD as a function of X-ray energy. (B) The electron density map of PepD zinc ions binding site, as part of a composite-omit map contoured at  $1.0 \sigma$  (blue), and anomalous map contoured at  $4.0 \sigma$  (red).

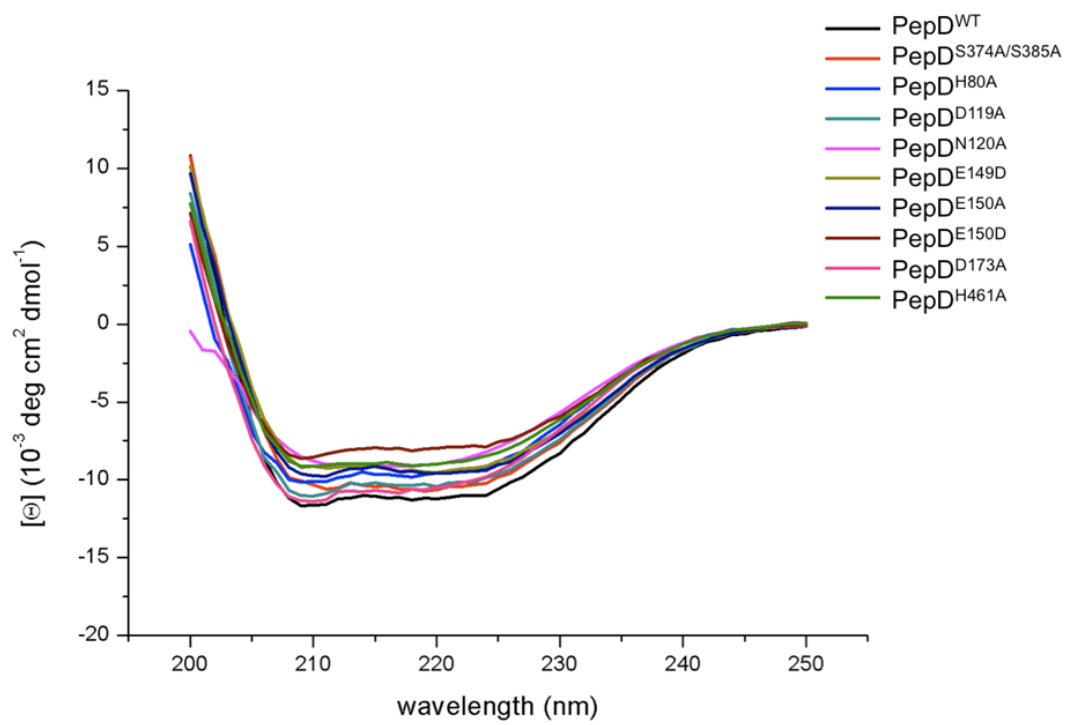

**Supplement Figure 2.** The CD spectra of *V. alginolyticus* PepD wild-type and various mutants.

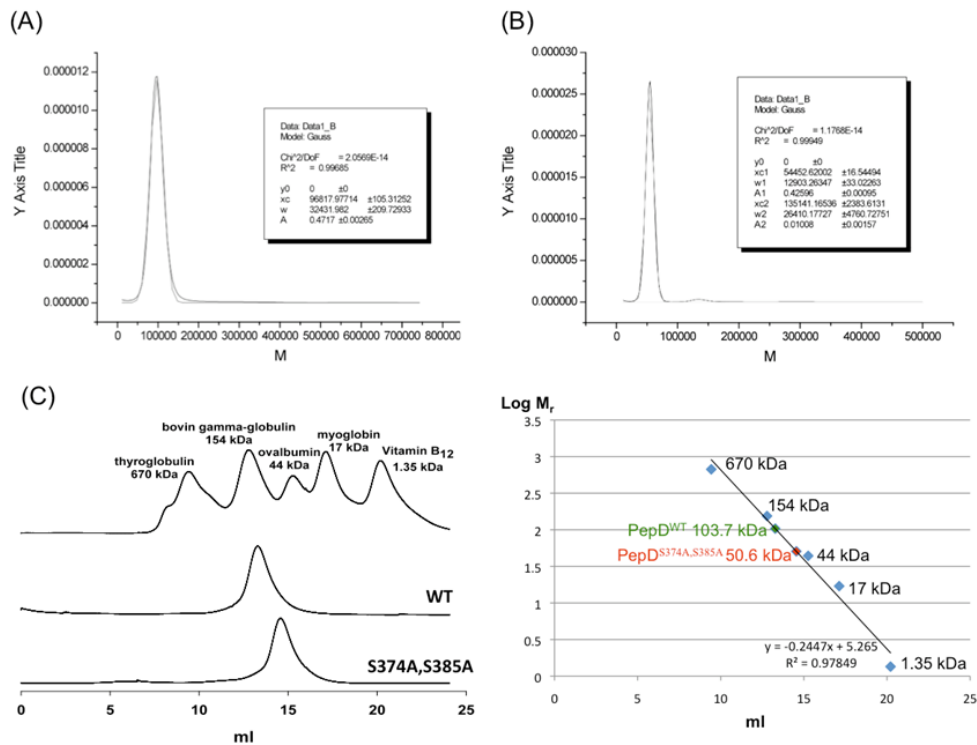

**Supplement Figure 3.** Molecular masses determination of PepD<sup>WT</sup> and PepD<sup>S374A/S385A</sup> mutant. Analytical ultracentrifugation determination of (A) PepD<sup>WT</sup> and (B) PepD<sup>S374A/S385A</sup> mutant, showing the calculated molecular weight from sedimentation coefficient (s) of approximately  $96817.977 \pm 105.3$  g/mol and  $54452.62 \pm 16.5$  g/mol, respectively. (C) Chromatographic separation and calibration curve for the standard proteins, PepD<sup>WT</sup> and PepD<sup>S374A/S385A</sup> on Superdex 200 10/300 GL column (GE Healthcare<sup>TM</sup>). In the calibration curve, the molecular mass of PepD<sup>WT</sup> (green dot) and PepD<sup>S374A/S385A</sup> (red dot) were determined to be 103.7 and 50.6 kDa, respectively.
